# Supplementary material for: Influence of sucrose on the stability of W1/O/W2 double emulsion droplets
Source: Royal Society of Chemistry journal article supplement (doi:10.1039/c5ra11155b), 2015-01-01
Supplement: c5ra11155b1.pdf [file c5ra11155b1.pdf]

## Electronic Supplementary Information

### Influence of sucrose on the stability of W1/O/W2 double emulsion droplets

Jie Li, Lin Su, Jing Li, Mei-Fang Liu, Su-Fen Chen, Bo Li, Zhan-Wen Zhang, Yi-Yang Liu\*

Research Center of Laser Fusion, China Academy of Engineering Physics, Mianyang 621900, China

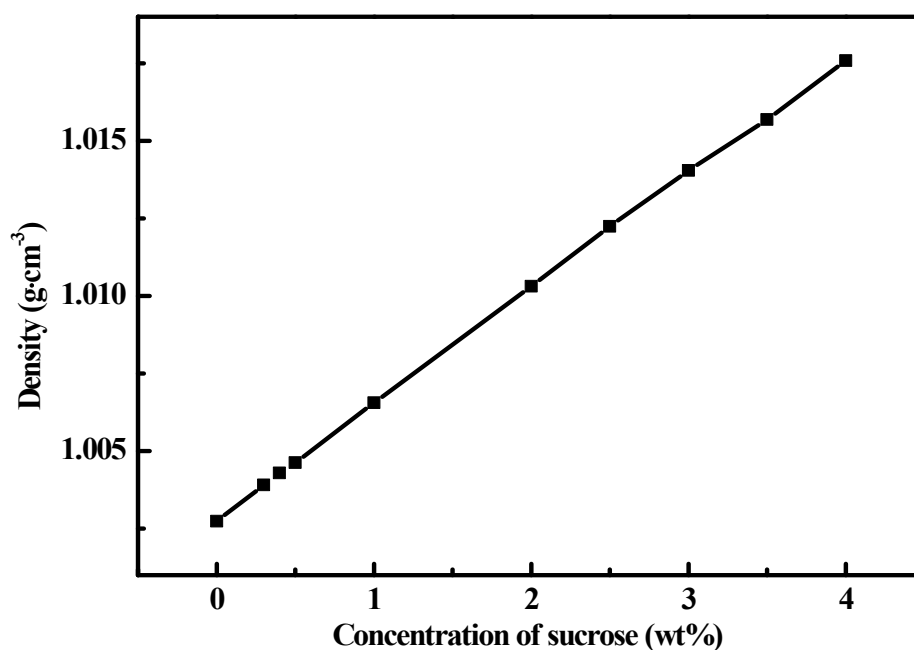

Figure S1 Density ( $\rho$ ) of W2 phase with various sucrose concentrations

\* Corresponding author: Tel: + 86 0816 2484234; fax: + 86 0816 2493148.

E-mail addresses: [guxing\\_nk@aliyun.com](mailto:guxing_nk@aliyun.com)

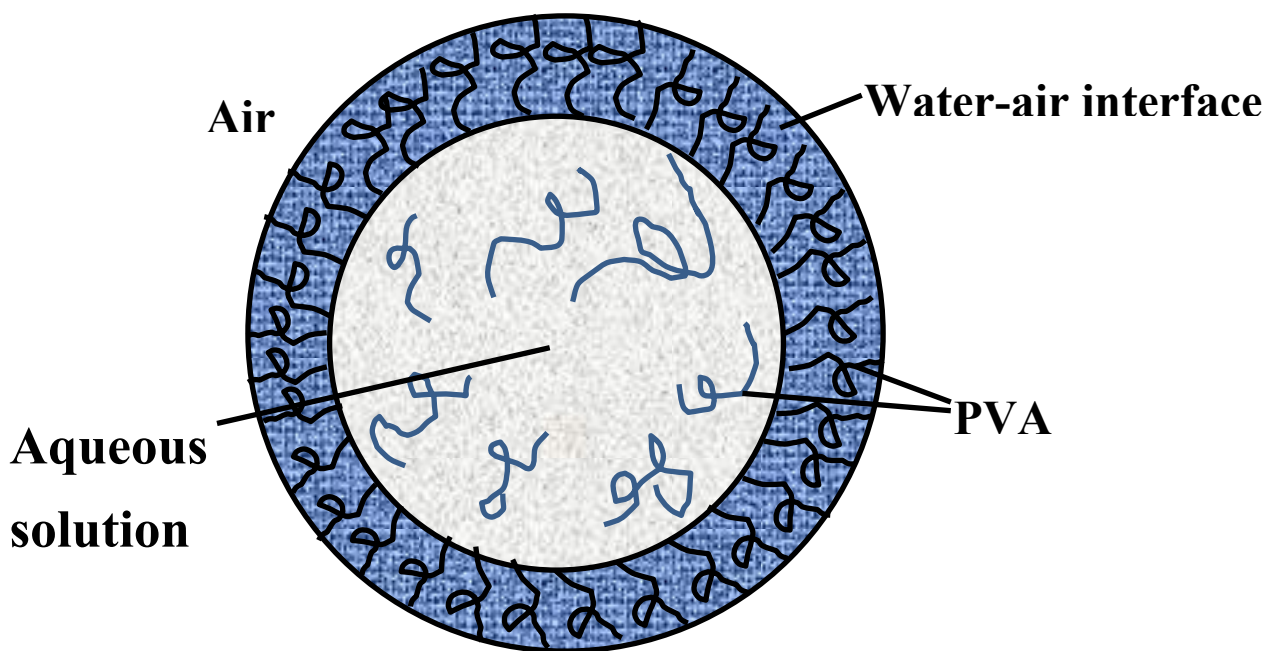

**Figure S2(a)** Schematic diagram of behavior of PVA dissolved in water: the outer part of the circle is air, the dark blue ring is concentrated PVA solution, and the center part is dilute PVA solution <sup>32</sup>.

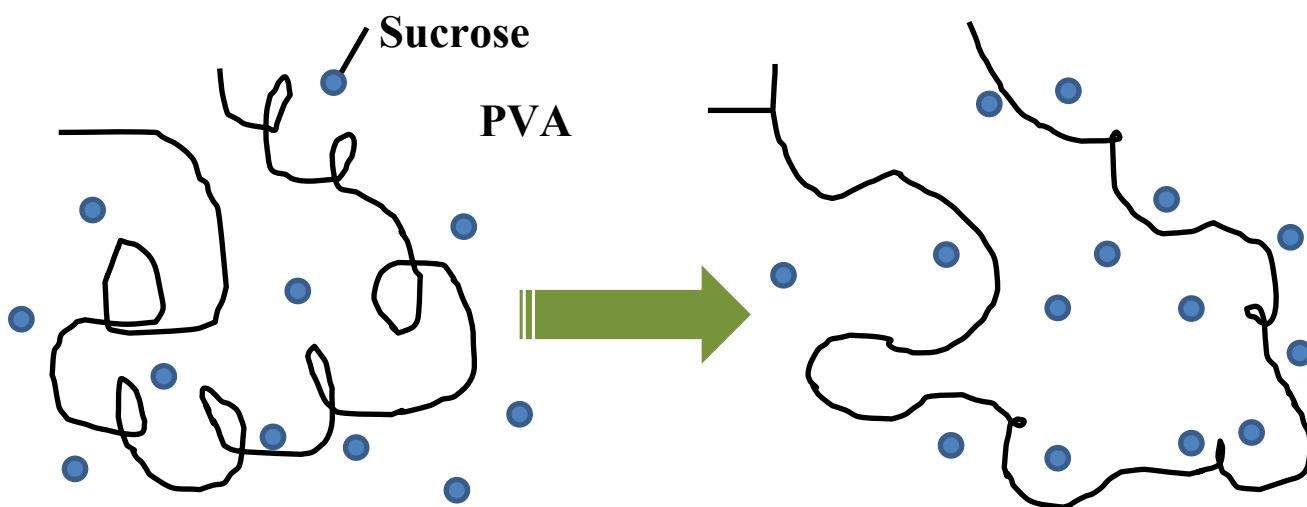

**Figure S2(b)** Schematic diagram of interaction between PVA chains and sucrose molecules

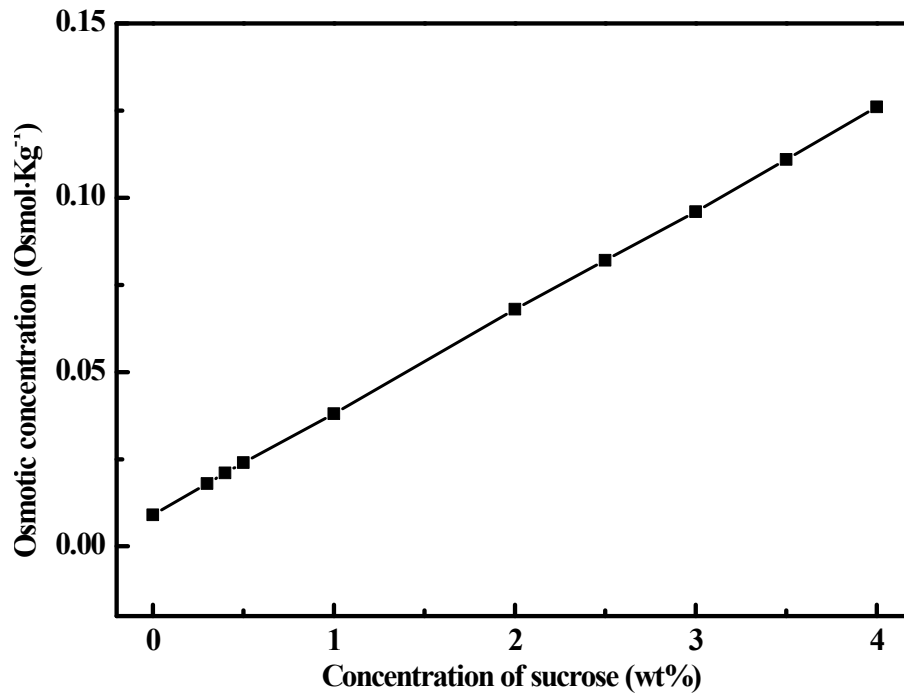

**Figure S3** Osmotic pressure of W2 phase with various sucrose concentrations
